# Supplementary material for: MOF-derived porous hollow Co3O4parallelepipeds for building high-performance Li-ion batteries
Source: Royal Society of Chemistry journal article supplement (doi:10.1039/c5ta06205e), 2015-01-01
Supplement: c5ta06205e1.pdf [file c5ta06205e1.pdf]

## Supporting Information

### MOF-derived porous hollow Co<sub>3</sub>O<sub>4</sub> parallelepipeds building high-performance Li-ion batteries

Yan Han,<sup>\*ab</sup> Mengli Zhao,<sup>a</sup> Lei Dong,<sup>a</sup> Jianmin Feng,<sup>a</sup> Dejun Li,<sup>a</sup> Yijing Wang,<sup>b</sup> and Xifei Li<sup>\*a</sup>

<sup>a</sup>Energy & Materials Engineering Centre, College of Physics and Materials Science, Tianjin Normal University, Tianjin 300387, China. E-mail: hanyan2664@mail.nankai.edu.cn; xfli2011@hotmail.com

<sup>b</sup>Key Laboratory of Advanced Energy Materials Chemistry (Ministry of Education), Nankai University, Tianjin 300071, China

#### Part I: Experimental Details

Synthesis of the hollow Co<sub>3</sub>O<sub>4</sub> parallelepipeds: The parallelepiped Co-MOF ([Co<sub>3</sub>(HCOO)<sub>6</sub>]·DMF) crystal was conveniently synthesized. Typically, cobalt (II) nitrate hexahydrate (3.405 g, 11.7 mmol) and formic acid (0.45 mL, 88%, 11.7 mmol) were dissolved in 10 mL DMF under stirring for several minutes. The mixture was incubated in an oven at 100 °C for 24 h. The resultant light pink Co-MOF crystalline precipitate was filtered, rinsed with DMF for several times and dried under vacuum overnight. To obtain Co<sub>3</sub>O<sub>4</sub>, the as-made Co-MOF crystals were placed in a tube furnace and heated in air at 400 °C for 3 h at a heating rate of 5 °C min<sup>-1</sup>. For comparison, the Co<sub>3</sub>O<sub>4</sub> particles were prepared by thermal decomposition of commercial CoCO<sub>3</sub> in Air.

Characterization of materials: The structure and morphology of the obtained samples were characterized by X-ray diffraction (XRD, Bruker D8 Advance with Cu K $\alpha$  radiation), scanning electron microscopy (SEM, Hitachi SU8010) and transmission electron microscopy (TEM, FEI Tecnai G<sup>2</sup> F20). The porous structural

feature was determined using a nitrogen adsorption-desorption measurement (Quantachrome Quadrasorb SI). And the pore size distribution was analyzed using the density functional theory (DFT) method from the adsorption branch. Thermogravimetric analysis (TGA) was carried out on a METTLER TGA-DSC 1 apparatus with a heating rate of 10 °C min<sup>-1</sup> under air.

Electrochemical measurement: The working electrode was fabricated by casting slurry containing Co<sub>3</sub>O<sub>4</sub>, acetylene black (Super-P) and polyvinylidene fluoride (PVDF) (at a weight ratio of 8:1:1) on Cu foil followed by drying at 120 °C in vacuum for 12 h and being cut into disks with diameter of 12 mm. The mass loading of each integrated electrode was about 3 mg. Electrochemical measurements were carried out via CR2032 coin-type cells assembled in an Ar-filled glove-box. Li foil and Celgard 2400 membrane were employed as the counter/reference electrode and the separator, respectively. And the electrolyte was 1 M LiPF<sub>6</sub> in ethylene carbonate/ethyl methyl carbonate/dimethyl carbonate (1:1:1 v/v/v). The galvanostatic charge-discharge tests were performed at different current densities of 100-1000 mA g<sup>-1</sup> with the range of 0.01-3.00 V (vs Li<sup>+</sup>/Li) using LAND CT2001A battery tester.

## Part II: Supplementary Figures

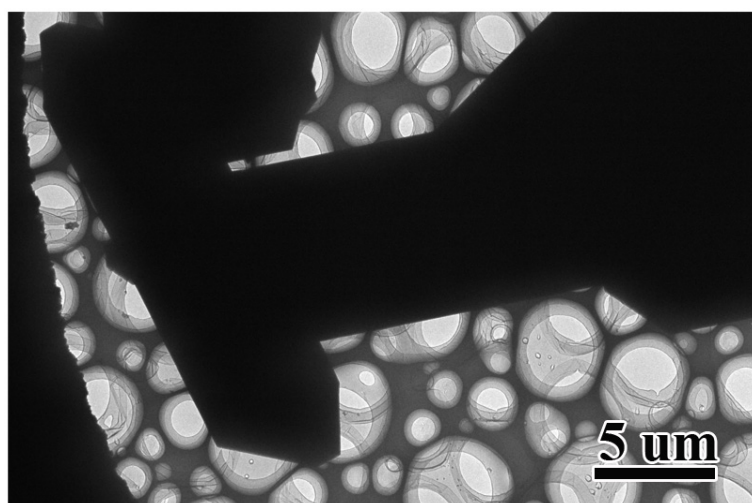

**Fig. S1** TEM image of the Co-MOF precursor.

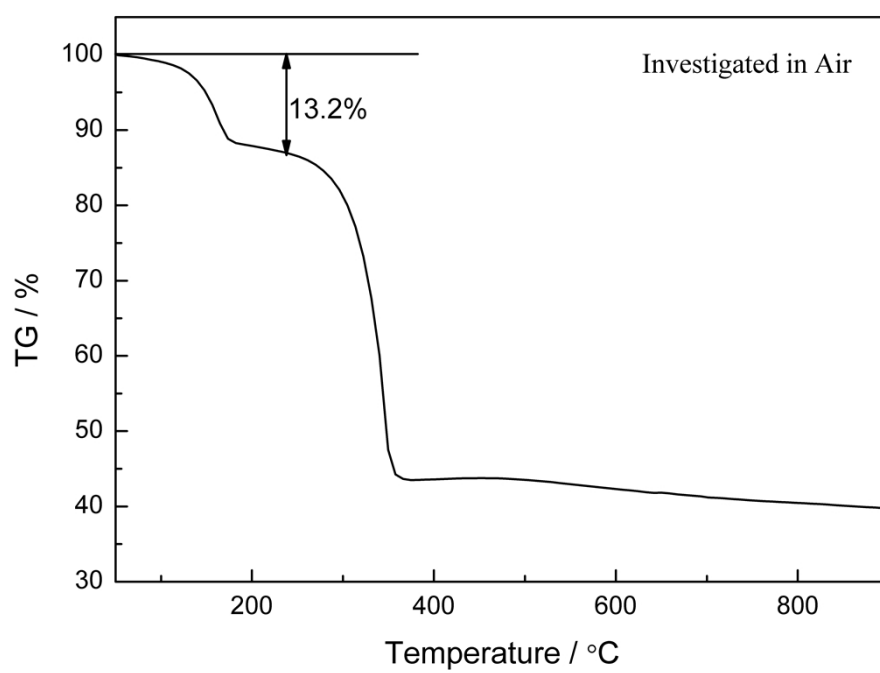

**Fig. S2** TGA curve of the Co-MOF precursor.

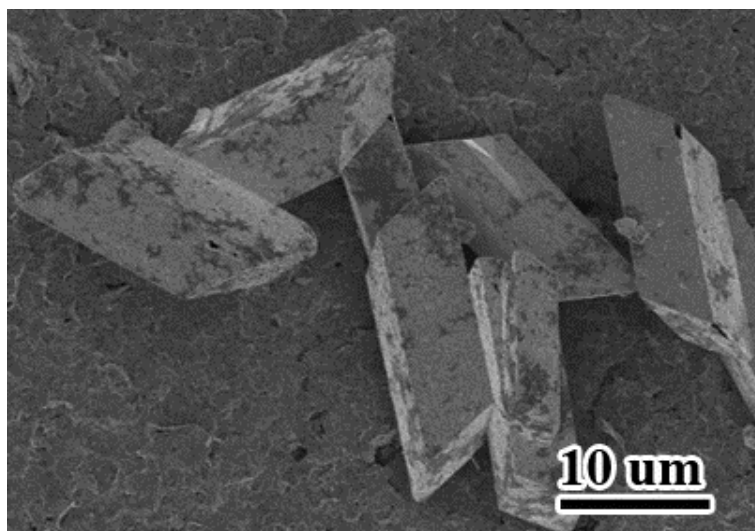

**Fig. S3** Low magnification SEM image of Co<sub>3</sub>O<sub>4</sub> parallelepipeds.

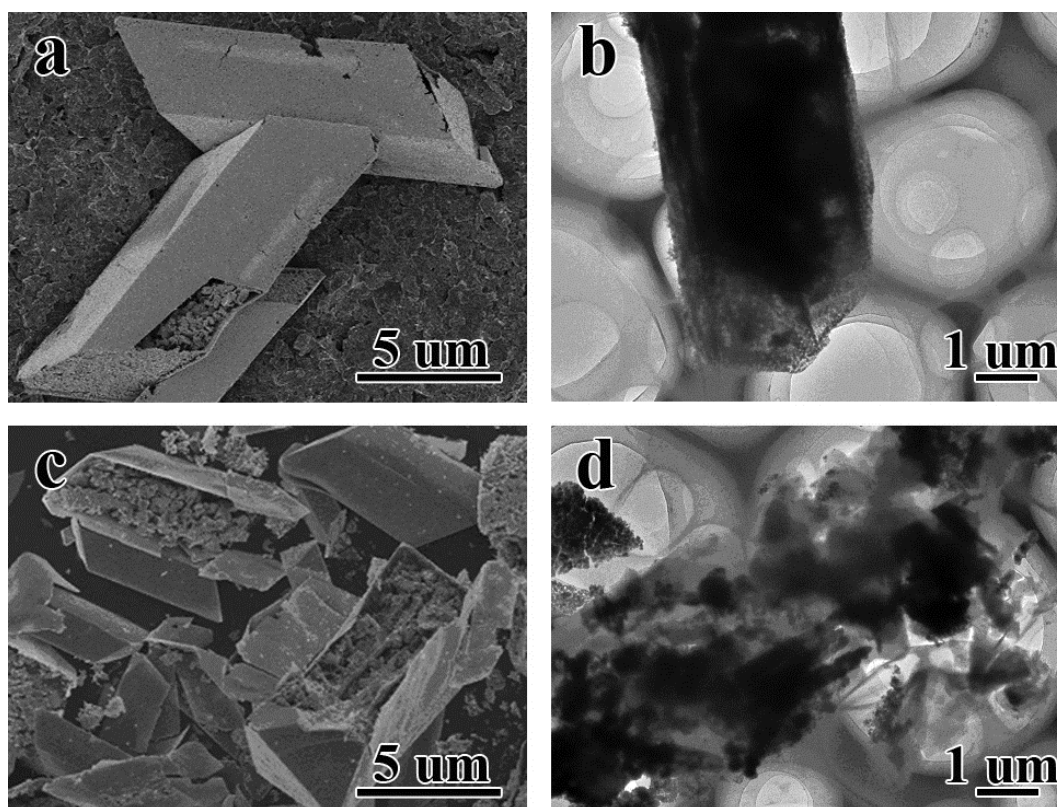

**Fig. S4** SEM and TEM images of samples formed by the thermal decomposition of Co-MOF precursor in air at (a, b) 300 °C and (c, d) 500 °C.

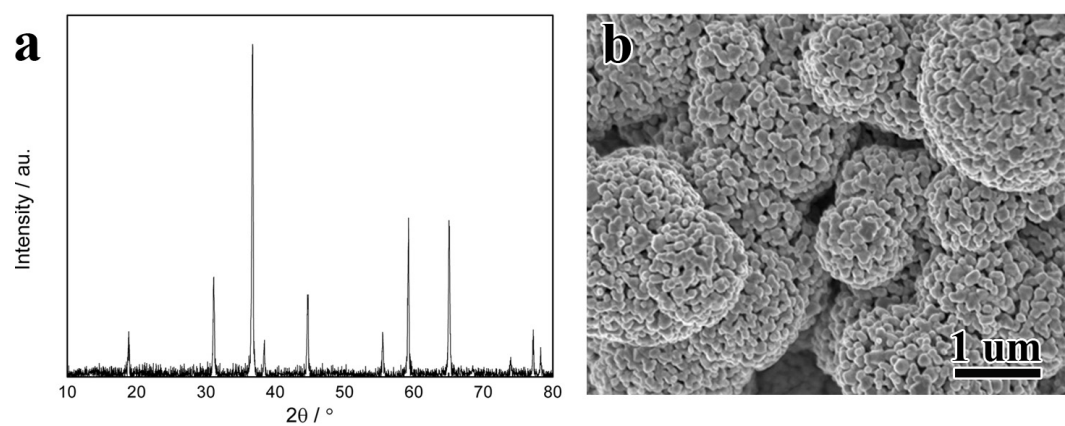

**Fig. S5** (a) XRD pattern and (b) SEM image of the  $\text{Co}_3\text{O}_4$  particles.
